# Supplementary material
Source: Springer Nature journal article supplement (https://www.springermedizin.de/resource/supplementary/12884_2013_832_MOESM3_ESM.pdf/9458280)

# Number of children

60

40

20

0

Boys

Girls

1969-1986

1987-1996

1997-2005

2006-2012

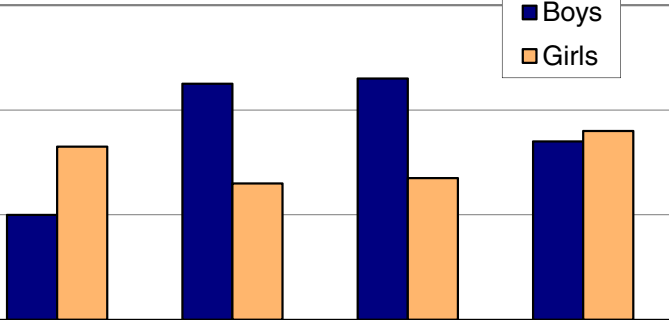

Supplement: MOESM3 [file 9458280]
